# Supplementary material for: The Prevalence of Dietary Supplement Use among College Students: A Nationwide Survey in Japan
Source: PubMed Central journal article supplement (PMC5707722; doi:10.3390/nu9111250), 2017-11-15
Supplement: nutrients-09-01250-s001.pdf [file nutrients-09-01250-s001.pdf]

Table S1. Preliminary Survey

|                                                                                                                                        |
|----------------------------------------------------------------------------------------------------------------------------------------|
| <b>Q1: Have you ever learned about food or nutrition in your college?</b>                                                              |
| A1: Yes, I have.<br>A2: Not yet. But, I will.<br>A3: No, I have not. And I will not.<br>A4: I don't remember it.                       |
| <b>Q2: Have you ever learned about dietary supplements in your college?</b>                                                            |
| A1: Yes, I have.<br>A2: Not yet. But, I will.<br>A3: No, I have not. And I will not.<br>A4: I don't remember it.                       |
| <b>Q3: Have you ever used dietary supplements?</b>                                                                                     |
| A1: Yes, I am using dietary supplements.<br>A2: Yes. I used to use dietary supplements, but I quit.<br>A3: No, I have never used them. |

Note: A segment of the people who answered "A1 or A2 in Q3" moved on to the full survey.

Table S2. Full Survey

|                                                                                                                                                                                                                                                                                                    |
|----------------------------------------------------------------------------------------------------------------------------------------------------------------------------------------------------------------------------------------------------------------------------------------------------|
| <b>Q1: How do you get information about dietary supplements? – Multiple choice</b>                                                                                                                                                                                                                 |
| A1: Television<br>A2: Radio<br>A3: Newspapers, magazines, flyers<br>A4: Internet<br>A5: Stores<br>A6: Clinic (physicians, pharmacists, dietitians)<br>A7: Pharmacists or drug store clerks<br>A8: Manufacturer<br>A9: Product labels<br>A10: Family<br>A11: Friends or acquaintances<br>A12: Other |
| <b>Q2: How do you obtain dietary supplements? – Multiple choice</b>                                                                                                                                                                                                                                |
| A1: Pharmacy or drugstore<br>A2: Retail store<br>A3: Convenience store<br>A4: Supermarket<br>A5: Department store                                                                                                                                                                                  |

|                                                                                                                                                                                                                                                                                                                                 |
|---------------------------------------------------------------------------------------------------------------------------------------------------------------------------------------------------------------------------------------------------------------------------------------------------------------------------------|
| <p>A6: Internet</p> <p>A7: Mail order</p> <p>A8: Co-op store</p> <p>A9: Family</p> <p>A10: Friends or acquaintances</p> <p>A11: Other</p>                                                                                                                                                                                       |
| <p><b>Q3: What is the purpose of dietary supplement use? – Multiple choice</b></p>                                                                                                                                                                                                                                              |
| <p>A1: Maintenance of health</p> <p>A2: Supplementation of nutrients</p> <p>A3: Beauty benefits</p> <p>A4: Weight loss</p> <p>A5: Building muscle</p> <p>A6: Improvement of health</p> <p>A7: Prevention of diseases</p> <p>A8: Treatment of diseases</p> <p>A9: Other</p>                                                      |
| <p><b>Q4: How many dietary supplements are you using (or did you use)?</b></p>                                                                                                                                                                                                                                                  |
| <p>A1: 1</p> <p>A2: 2</p> <p>A3: 3</p> <p>A4: 4</p> <p>A5: 5</p> <p>A6: 6+</p>                                                                                                                                                                                                                                                  |
| <p><b>Q5: Which dietary supplements are you using or did you use? – Free answer, up to 5 products</b></p>                                                                                                                                                                                                                       |
| <p><b>Q6: Have you ever experienced adverse effects due to dietary supplement use?</b></p> <p><b>If yes, what symptom(s) did you experience? – Multiple choice</b></p>                                                                                                                                                          |
| <p>A1: No, I have never experienced adverse effects.</p> <p>A2: Nausea and vomiting</p> <p>A3: Headache</p> <p>A4: Stomachache</p> <p>A5: Diarrhea</p> <p>A6: Constipation</p> <p>A7: Eczema and Itching</p> <p>A8: Fatigue</p> <p>A9: Palpitations</p> <p>A10: Results of medical check had become worse</p> <p>A11: Other</p> |
| <p><b>Q7: How did you response to adverse effects? – Multiple choice</b></p>                                                                                                                                                                                                                                                    |

A1: Did nothing

A2: Stopped using dietary supplements immediately

A3: Consulted with family or friends

A4: Consulted with mentors in college

A5: Complained to manufacturer

A6: Complained to the retail store

A7: Reported to the National Consumer Affairs Center of Japan or other consumer affairs center

A8: Reported to the Ministry of Health, Labor, and Welfare or Consumer Affairs Agency, Government of Japan

A9: Reported to public health center

A10: Went to a hospital

A11: Other
